# Supplementary material for: Enhanced surface Lewis acidity of ZrO2 by –HSO4 for efficient CF4 decomposition
Source: Royal Society of Chemistry journal article supplement (doi:10.1039/d3en00826f), 2024-01-01
Supplement: d3en00826f1.pdf [file d3en00826f1.pdf]

## Supporting information

### **Enhanced surface Lewis acidity of ZrO<sub>2</sub> by –HSO<sub>4</sub> for efficient CF<sub>4</sub> decomposition**

Yingkang Chen<sup>a†</sup>, Cheng-Wei Kao<sup>b†</sup>, Tao Luo<sup>a</sup>, Hang Zhang<sup>a</sup>, Yan Long<sup>a</sup>, Junwei Fu<sup>a</sup>,  
Zhang Lin<sup>c</sup>, Liyuan Chai<sup>c</sup>, Ting-Shan Chan<sup>b\*</sup>, Min Liu<sup>a,c\*</sup>

<sup>a</sup>Hunan Joint International Research Center for Carbon Dioxide Resource Utilization,  
School of Physics, and School of Metallurgy and Environment, Central South University,  
Changsha 410083, Hunan, P. R. China

<sup>b</sup>National Synchrotron Radiation Research Center, Hsinchu 30076, Taiwan

<sup>c</sup>School of Metallurgy and Environment, Central South University, Changsha 410083,  
Hunan, P. R. China

† These authors contributed equally.

\*Corresponding author

E-mail address:

[chan.ts@nsrrc.org.tw](mailto:chan.ts@nsrrc.org.tw) (Ting-Shan Chan)

[minliu@csu.edu.cn](mailto:minliu@csu.edu.cn) (Min Liu)

## 1. Characterization of catalysts

X-ray diffraction (XRD) patterns were obtained by using a STADIP automated transmission diffractometer, operated at 36 kV and 20 mA by using CuK $\alpha$ 1 radiation. The XRD patterns were scanned in the 2 Theta range of 15-90°.

The transmission electron microscopy (TEM) and energy dispersive X-ray spectroscopy (EDS) images were obtained by JEOL 3010 operated at 200 kV. The finely ground sample was dispersed in ethanol and then dropped onto a copper grid for TEM and EDX testing.

The Brunauer-Emmett-Teller (BET) surface area and pore size distribution of the catalysts were determined by N<sub>2</sub> adsorption-desorption analysis using AUTOSORB IQ. Prior to measurements, the samples were degassed at 300 °C for 6 h, at a rate of 10 °C/min.

ICP-OES tests of all samples were performed by an Agilent 5110 spectrometer. Prior to testing, the samples were completely dissolved by sonication in a 5% concentration of HF solution. Then, the F ions in the test liquid were evaporated at room temperature.

NH<sub>3</sub> (or CF<sub>4</sub>)-temperature programmed desorption (TPD) was performed by using a PCA-1200 on a chemisorption analyzer equipped with a thermal conductivity detector (TCD). The chemisorption analyzer was PCA-1200 from Beijing Builder electronic technology Co., Ltd. For each experiment, the weighed sample (100 mg) was pretreated at 600 °C (10 °C/min) for 2 h under Ar (30 mL/min) and cooled to room temperature. Then the NH<sub>3</sub> (or CF<sub>4</sub>) gas (30 mL/min) was introduced instead of Ar at this temperature for 1 h to ensure the saturation adsorption of NH<sub>3</sub> (or CF<sub>4</sub>). The sample was then purged with Ar for 1 h (30 mL/min) until the signal returned to the baseline as monitored by a TCD. The desorption curve of NH<sub>3</sub> (or CF<sub>4</sub>) was acquired by heating the sample from room temperature to 800°C (10 °C/min) under Ar with the flow rate of 30 mL min<sup>-1</sup>.

Pyridine-infrared (py-IR) spectra of samples were analyzed by a Thermo IS-50 Fourier Transform infrared (FTIR) spectrometer. The sample was heated at 600 °C for 5 h, and

cooled to room temperature. Then, vacuumized to  $10^{-3}$  Torr, samples were exposed to pyridine vapour (3000 Pa) at 100 °C for 1 h, followed by reevacuation for 1 h, and lower the temperature to take out our samples. After this step, the sample was analyzed by FTIR.

*In situ* IR spectra of sample was also analyzed by a Thermo IS-50 FTIR spectrometer. Self-supported wafer was prepared from catalyst powder (ca. 10 mg). The wafer was loaded into an *in situ* IR thermal catalytic cell with  $\text{CaF}_2$  windows and pretreated under Ar flow at 650 °C for 2 h. Then regulated to the target temperature to obtain a background spectrum which should be deducted from the sample spectra. As for the transient reactions with  $\text{CF}_4$  and  $\text{H}_2\text{O}$ , after the background spectra at appointed temperatures under Ar flow was obtained, the catalyst was exposed to  $1 \text{ mL min}^{-1}$  20%  $\text{CF}_4/\text{Ar} + \text{H}_2\text{O}$  (50 mL Ar passing through water bottle) at 580 °C and meanwhile the reaction process was recorded as a function of time.

## 2. Computation detail

All our investigations in this study are based on density functional theory, as implemented in the Vienna ab initio simulation package (VASP)[1,2]. The exchange-correlation potential is treated with the Perdew-Burke- Ernzerhof (PBE) formula by using the projected augmented wave (PAW) method within the generalized gradient approximation (GGA)[3]. The cut-off energy for all calculations was set to be 450 eV. All the positions of atoms are fully relaxed until the Hellmann-Feynman forces on each atom are less than 0.01 eV/Å. Meanwhile, a k-points  $\Gamma$ -centered mesh is generated for Brillouin zone samples. The DFT-D3 method proposed by Grimme was adopted to describe the van der Waals interactions, which has been shown to accurately describe chemisorption and physisorption properties on layered material. In addition, A vacuum region of about 15Å was used to decouple the periodic replicas.

[1]. Kresse, Georg, and Jürgen Hafner. "Ab initio molecular dynamics for liquid metals." Physical Review B 47.1 (1993): 558.

- [2]. Kresse, Georg, and Jürgen Furthmüller. "Efficient iterative schemes for ab initio total-energy calculations using a plane-wave basis set." *Physical review B* 54.16 (1996): 11169.
- [3]. Perdew, John P., Kieron Burke, and Matthias Ernzerhof. "Generalized gradient approximation made simple." *Physical review letters* 77.18 (1996): 3865

### 3. Results

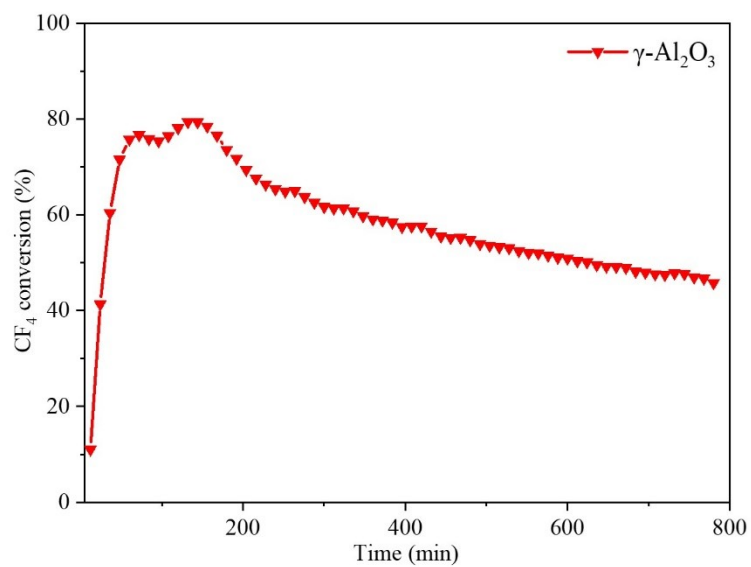

Figure S1. The CF<sub>4</sub> decomposition test of  $\gamma\text{-Al}_2\text{O}_3$  under 650 °C.

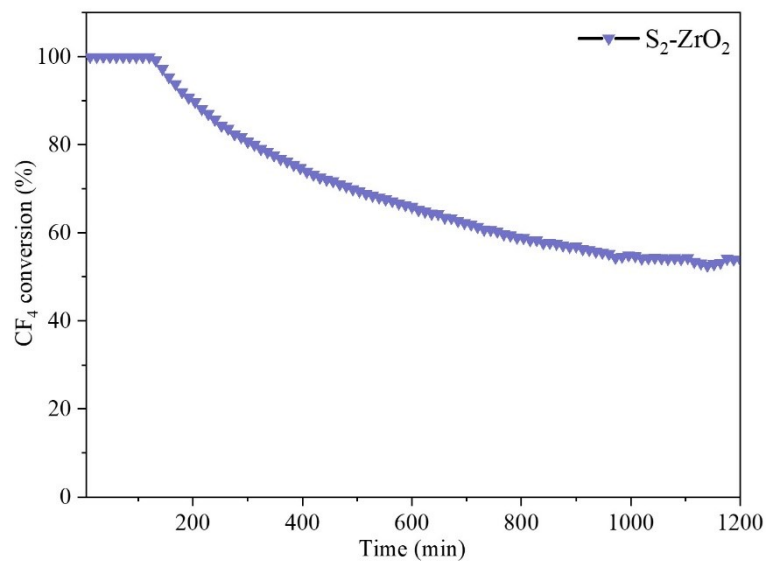

Figure S2. The stability test of the best catalyst S<sub>2</sub>-ZrO<sub>2</sub> under 650 °C.

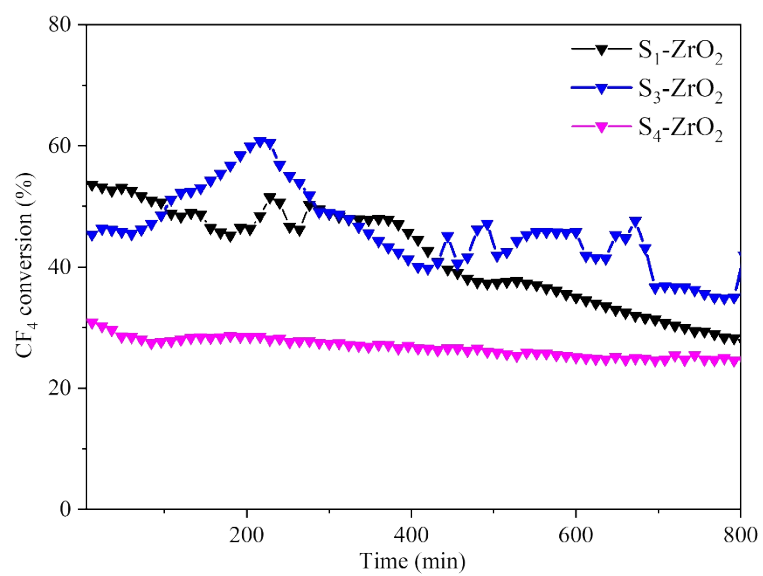

Figure S3. The stability test of S<sub>1</sub>-ZrO<sub>2</sub>, S<sub>3</sub>-ZrO<sub>2</sub> and S<sub>4</sub>-ZrO<sub>2</sub> catalysts under 650 °C.

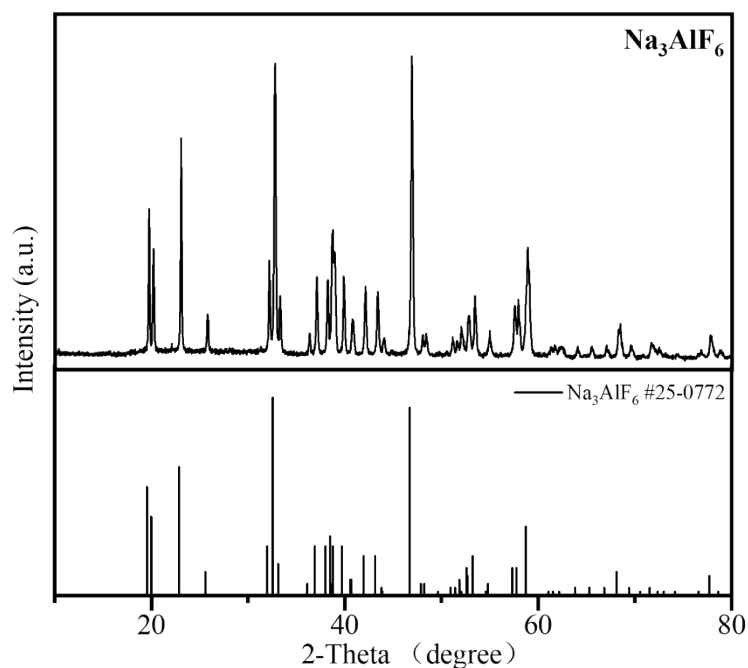

Figure S4. The XRD pattern of the obtained  $\text{Na}_3\text{AlF}_6$  by recycling HF.

The F ion contents in the solution were quantified by employing the F ion selective electrode method. After decomposition of  $\text{CF}_4$  with the  $\text{S}_2\text{-ZrO}_2$  catalyst at  $650\text{ }^\circ\text{C}$  for 10 h, the amount of F ion in solution was about  $350\text{ mg L}^{-1}$ . As shown in Fig. S4, the XRD pattern showed that the F ions were successfully resourced as electrolytic aluminum industry raw materials of  $\text{Na}_3\text{AlF}_6$  with a rate of 99.6%. The residual F ions in the solution decreased to  $\sim 1.4\text{ mg L}^{-1}$ , which is below to the World Health Organization's guideline for drinking water ( $1.5\text{ mg L}^{-1}$ ).



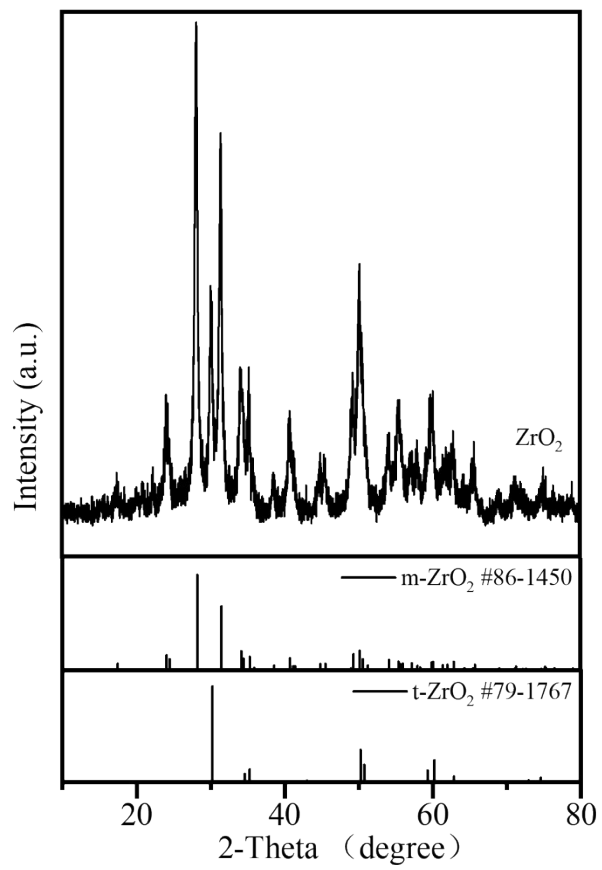

Figure S5. The XRD pattern of ZrO<sub>2</sub>.

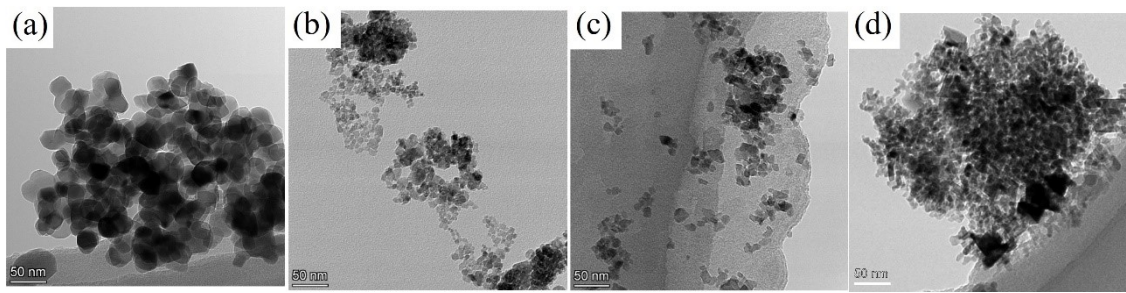

Figure S6. TEM images of (a) ZrO<sub>2</sub>, (b) S1-ZrO<sub>2</sub>, (c) S<sub>3</sub>-ZrO<sub>2</sub> and (d) S<sub>4</sub>-ZrO<sub>2</sub>.

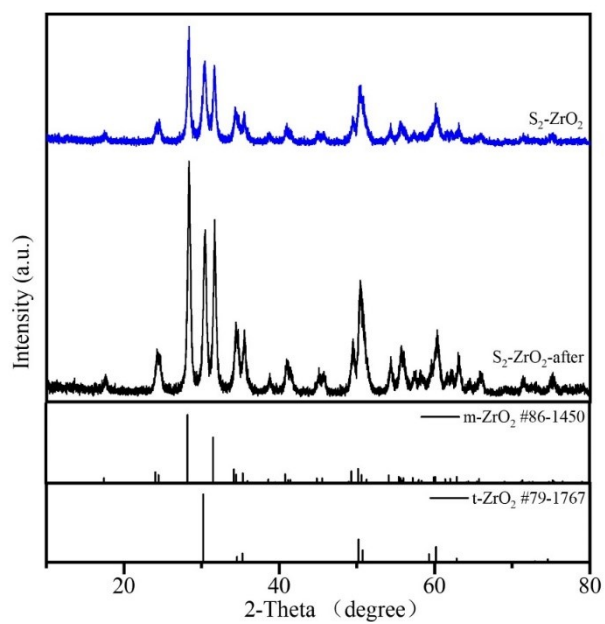

Figure S7. The XRD pattern of  $S_2\text{-ZrO}_2$  and  $S_2\text{-ZrO}_2\text{-after}$ .

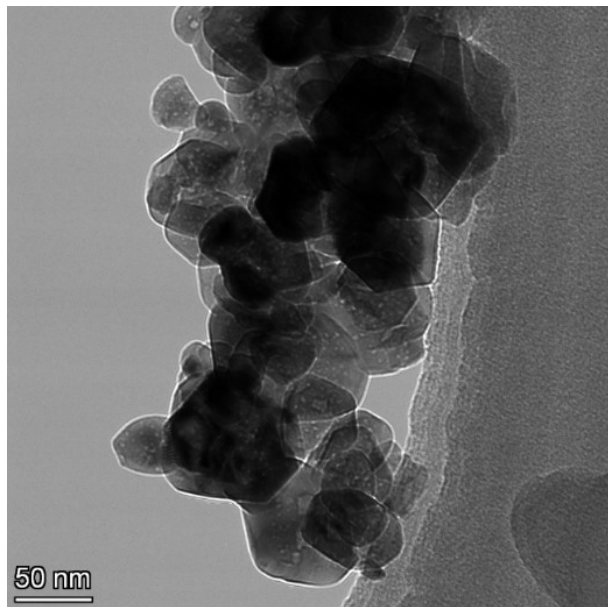

Figure S8. TEM image of S<sub>2</sub>-ZrO<sub>2</sub>-after.

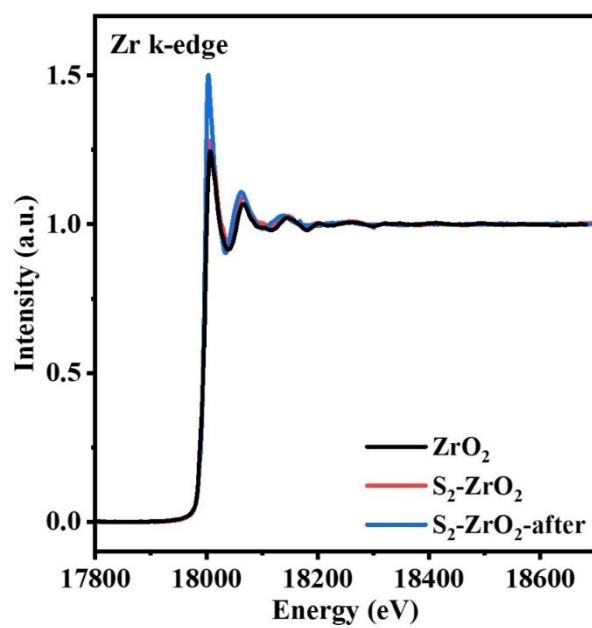

Figure S9. The Zr K-edge XANES spectra of  $\text{ZrO}_2$ ,  $\text{S}_2\text{-ZrO}_2$  and  $\text{S}_2\text{-ZrO}_2\text{-after}$ .

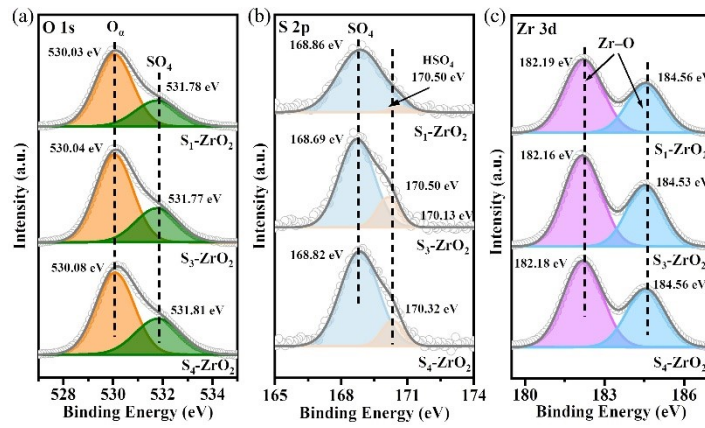

Figure S10. XPS spectra of (a) O 1s, (b) S 2p and (c) Zr 3d for S<sub>1</sub>-ZrO<sub>2</sub>, S<sub>3</sub>-ZrO<sub>2</sub> and S<sub>4</sub>-ZrO<sub>2</sub> catalysts.

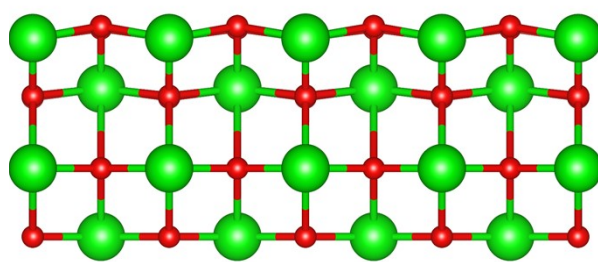

Figure S11. The calculation model of ZrO<sub>2</sub>.

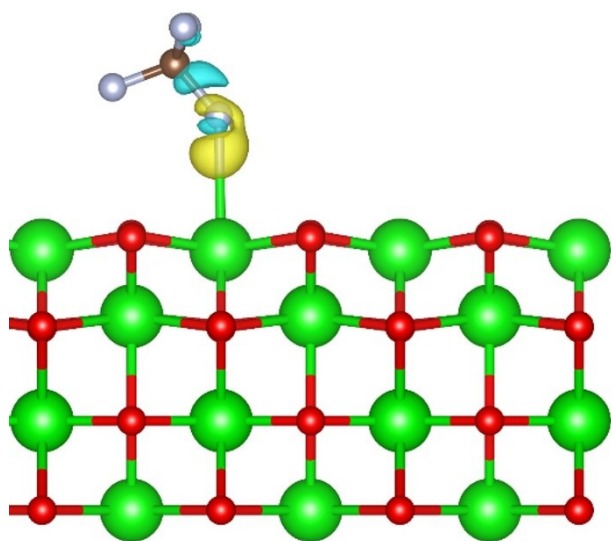

Figure S12. The calculation model of  $\text{ZrO}_2$  with  $\text{CF}_4$ .



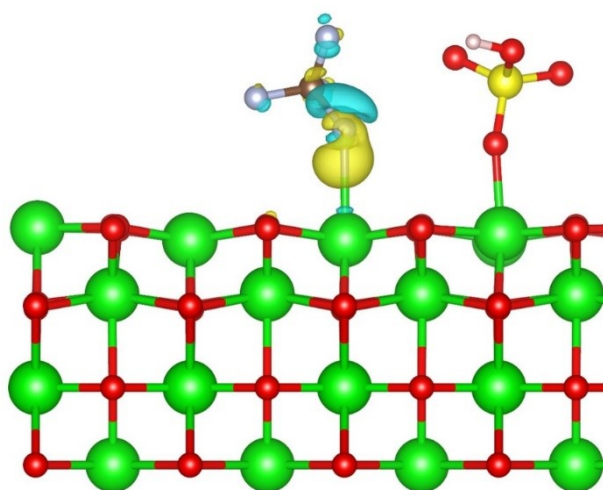

Figure S13. The calculation model of S-ZrO<sub>2</sub> with CF<sub>4</sub>.

Table S1. Physical properties and S content of ZrO<sub>2</sub> and S<sub>n</sub>-ZrO<sub>2</sub> samples.

| Sample                           | SA (m <sup>2</sup> /g) | PV (cm <sup>3</sup> /g) | APR   | S content (wt.%) |
|----------------------------------|------------------------|-------------------------|-------|------------------|
| ZrO <sub>2</sub>                 | 18.60                  | 0.13                    | 24.1  | -                |
| S <sub>1</sub> -ZrO <sub>2</sub> | 67.08                  | 0.1                     | 5.93  | 1.074            |
| S <sub>2</sub> -ZrO <sub>2</sub> | 67.13                  | 0.15                    | 8.99  | 1.226            |
| S <sub>3</sub> -ZrO <sub>2</sub> | 60.26                  | 0.17                    | 11.61 | 3.691            |
| S <sub>4</sub> -ZrO <sub>2</sub> | 64.11                  | 0.2                     | 12.72 | 4.486            |

Table S2. Physical properties and S content of S<sub>2</sub>-ZrO<sub>2</sub>-after.

| Sample                                  | SA (m <sup>2</sup> /g) | PV (cm <sup>3</sup> /g) | APR   | S content (wt.%) |
|-----------------------------------------|------------------------|-------------------------|-------|------------------|
| S <sub>2</sub> -ZrO <sub>2</sub> -after | 20.30                  | 0.06                    | 11.94 | 0.317            |

Table S3. Fitting Results of Zr K-edge EXAFS Data.

| Sample             | $R_{Zr-O}$ | $N_{Zr-O}$ | $R_{Zr-Zr}$ | $N_{Zr-Zr}$ | $R_{Zr-S}$ | $N_{Zr-S}$ |
|--------------------|------------|------------|-------------|-------------|------------|------------|
| $S_2-ZrO_2$        | 2.15       | 4.48       | 3.43        | 6.63        | 3.51       | 1.33       |
| $S_2-ZrO_2$ -after | 2.16       | 7.44       | 3.48        | 3.6         | -          | -          |

Table S4. The surface elements content with different states from XPS determination.

| Sample                           | Atomic concentration / % |       |                   |                  |
|----------------------------------|--------------------------|-------|-------------------|------------------|
|                                  | Zr 2d                    | O 1s  | S 2p              |                  |
|                                  |                          |       | -HSO <sub>4</sub> | -SO <sub>4</sub> |
| S <sub>1</sub> -ZrO <sub>2</sub> | 24.84                    | 54.85 | 0.64              | 2.72             |
| S <sub>3</sub> -ZrO <sub>2</sub> | 24.62                    | 56.11 | 0.64              | 2.90             |
| S <sub>4</sub> -ZrO <sub>2</sub> | 23.74                    | 54.62 | 0.74              | 3.16             |
